# Supplementary material for: The effects of set volume during isolated lumbar extension resistance training in recreationally trained males
Source: PeerJ. 2015 Mar 31;3:e878. doi: 10.7717/peerj.878 (PMC4389271; doi:10.7717/peerj.878)
Supplement: Supplemental Information 1 [file peerj-03-878-s001.xlsx]

## Sheet: Sheet1
1	1	143	134.71	-8.29	-11.24
2	1	202	191.29	-10.71	-14.53
3	1	180.86	202.14	21.29	28.86
4	1	352.43	395.57	43.14	58.5
5	1	161.57	182.57	21	28.48
6	1	175.57	185.57	10	13.56
7	1	207.57	251.71	44.14	59.86
8	1	124.71	147.43	22.71	30.8
9	1	295.14	306.14	11	14.92
10	2	216	258.57	42.57	57.73
11	2	309.57	354.86	45.29	61.41
12	2	205.29	236.14	30.86	41.84
13	2	329.57	334.29	4.71	6.39
14	2	224.14	192.14	-32	-43.39
16	2	158.14	195.14	37	50.17
17	2	240.86	272.57	31.71	43
18	2	297	333.57	36.57	49.59
19	3	295.29	275.14	-20.14	-27.31
20	3	267.57	272.71	5.14	6.97
21	3	331.86	299.29	-32.57	-44.17
22	3	171.29	176.14	4.86	6.59
23	3	271	257	-14	-18.98
24	3	218.14	161.29	-56.86	-77.1
25	3	224.71	231.71	7	9.49
26	3	220	187.29	-32.71	-44.36
27	3	255.71	191.29	-64.43	-87.37

## Sheet: Sheet2
Participant No.	Group	PreAvgStrength (Nm)	PostAvgStrength (Nm)	ChangeAvgStrength (Nm)
1	1ST	193.908	182.667	-11.2412
2	1ST	273.912	259.389	-14.5228
3	1ST	245.246	274.102	28.8692
4	1ST	477.895	536.393	58.4978
5	1ST	219.089	247.565	28.476
6	1ST	238.073	251.633	13.56
7	1ST	281.465	341.319	59.8538
8	1ST	169.107	199.915	30.7948
9	1ST	400.21	415.126	14.916
10	3ST	292.896	350.621	57.7249
11	3ST	419.777	481.19	61.4132
12	3ST	278.373	320.206	41.8462
13	3ST	446.897	453.297	6.38676
14	3ST	303.934	260.542	-43.392
16	3ST	214.438	264.61	50.172
17	3ST	326.606	369.605	42.9988
18	3ST	402.732	452.321	49.5889
19	CON	400.413	373.09	-27.3098
20	CON	362.825	369.795	6.96984
21	CON	450.002	405.837	-44.1649
22	CON	232.269	238.846	6.59016
23	CON	367.476	348.492	-18.984
24	CON	295.798	218.709	-77.1022
25	CON	304.707	314.199	9.492
26	CON	298.32	253.965	-44.3548
27	CON	346.743	259.389	-87.3671
